# Supplementary material for: Direct synthesis of graphene quantum dots from multilayer graphene flakes through grinding assisted co-solvent ultrasonication for all-printed resistive switching arrays
Source: Royal Society of Chemistry journal article supplement (doi:10.1039/c5ra21699k), 2016-01-01
Supplement: c5ra21699k1.pdf [file c5ra21699k1.pdf]

## Direct Synthesis of Graphene Quantum Dots from Multilayer Graphene Flakes through Grinding Assisted Co-Solvent Ultrasonication for All-Printed Resistive Switching Array

### Supplementary Material

*Table S1: Relation of centrifugation speed with diameters of extracted GQDs. It is evident from the table that variation in centrifugation speed yields change in the GQD diameters.*

| <b>Sample</b> | <b>Centrifugation Speed (rpm)</b> | <b>Diameter (nm)</b> |
|---------------|-----------------------------------|----------------------|
| <b>S-1</b>    | 5,000                             | $3.92 \pm 1.09$      |
| <b>S-2</b>    | 8,000                             | $3.04 \pm 0.83$      |
| <b>S-3</b>    | 10,000                            | $2.62 \pm 0.68$      |
| <b>S-4</b>    | 13,500                            | $1.96 \pm 0.43$      |
